# Supplementary material
Source: publisher site journal article supplement (https://www.dovepress.com/article/559986)
Supplement: Supplementary file 1 [file 559986%20Revised%20Supplementary%20Material.docx]

**Supplementary Material**

**
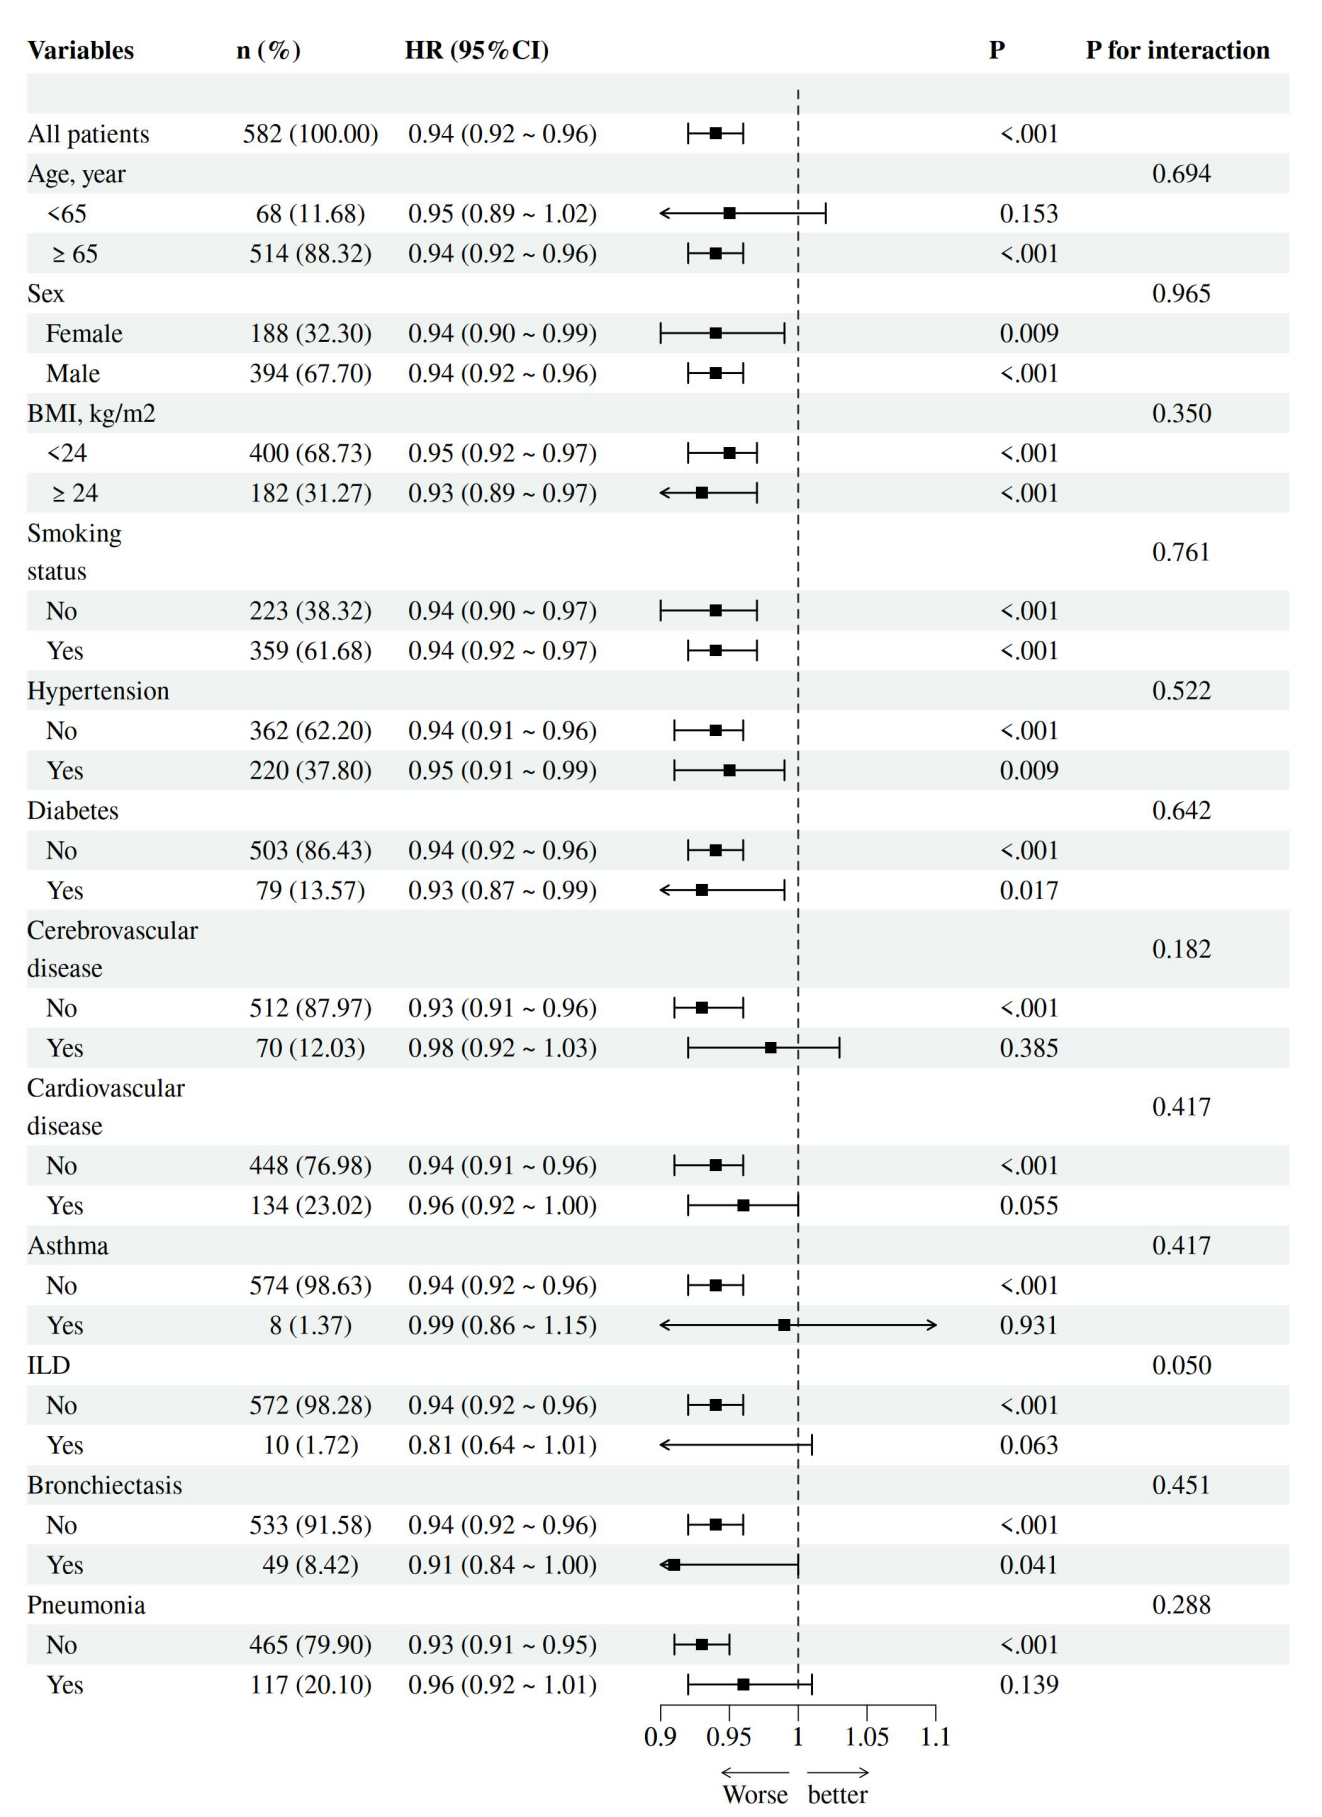
**

**Figure S1** Subgroup analysis of the association between PNI and all-cause mortality.

**
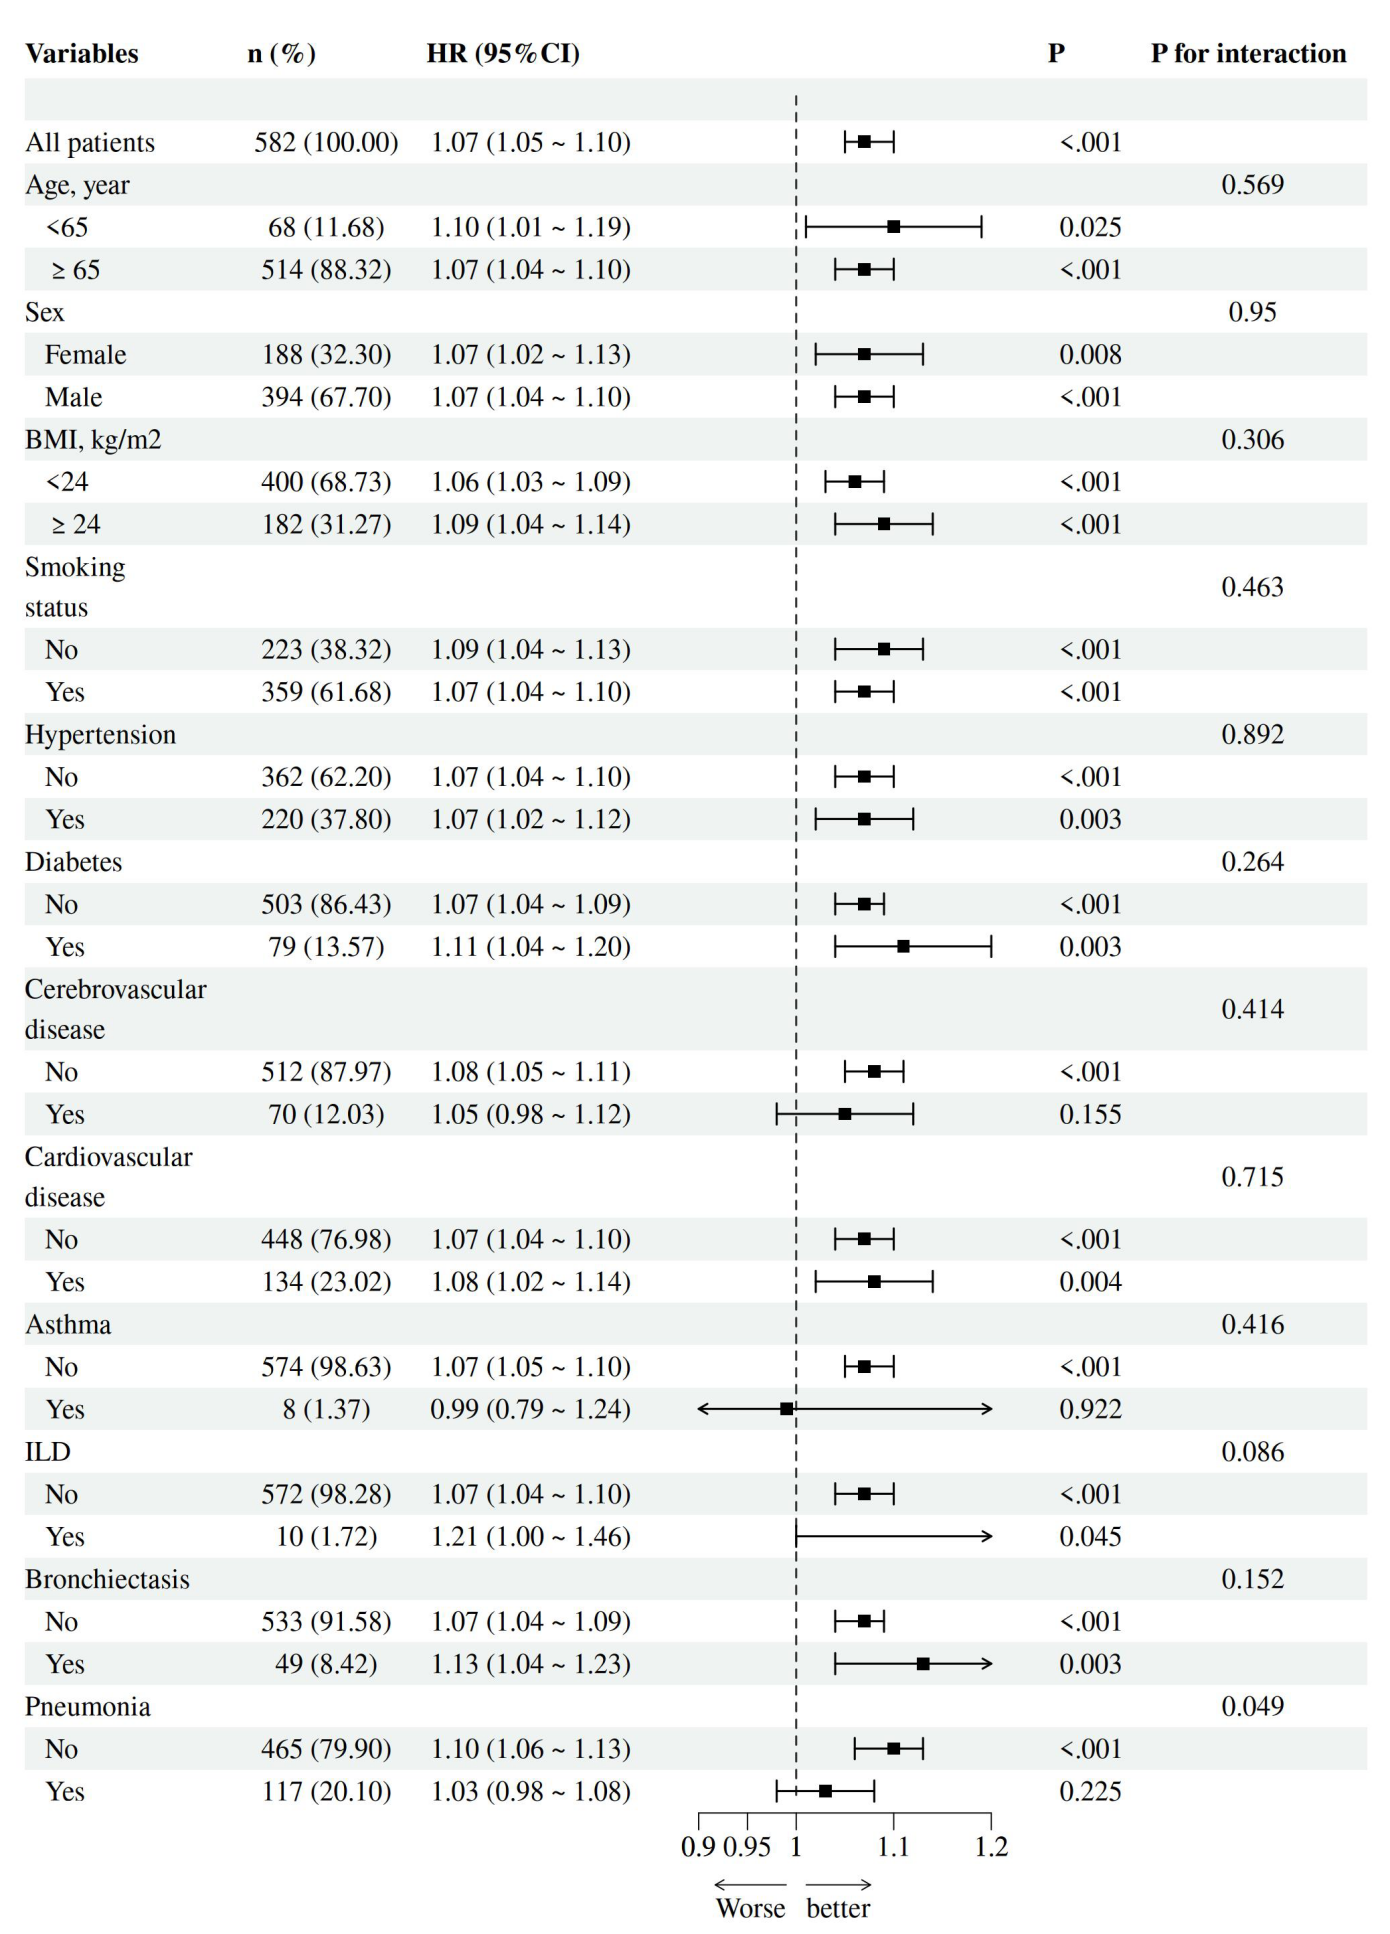
Figure S2** Subgroup analysis of the association between NPAR and all-cause mortality.
